# Supplementary material for: Association of Thiamine Use with Outcomes in Patients with Sepsis and Alcohol Use Disorder: An Analysis of the MIMIC-III Database
Source: PubMed Central journal article supplement — Infect Dis Ther. 2022 Feb 15;11(2):771–86. doi: 10.1007/s40121-022-00603-1 (PMC8960538; doi:10.1007/s40121-022-00603-1), 2022-02-15
Supplement: 40121_2022_603_MOESM1_ESM.pdf [file 40121_2022_603_MOESM1_ESM.pdf]

**Association of thiamine use with outcomes in septic patients with alcohol use disorder: an analysis  
of the MIMIC-III database**

Chang Hu, MD<sup>1,2†</sup>, Tong Wu, MD<sup>1,2†</sup>, Siqing Ma, MS<sup>3</sup>, Weipeng Huang, MD<sup>1,2</sup>, Qiancheng Xu, MD<sup>1,2</sup>,  
Kianoush B. Kashani, MD<sup>4,5</sup>, Bo Hu, MD<sup>1,2</sup>, Jianguo Li, MD<sup>1,2</sup>

<sup>1</sup>Department of Critical Care Medicine, Zhongnan Hospital of Wuhan University, Wuhan 430071, Hubei,  
China

<sup>2</sup>Clinical Research Center of Hubei Critical Care Medicine, Wuhan 430071, Hubei, China

<sup>3</sup>Department of Critical Care Medicine, Qinghai Provincial People's Hospital, Xining, Qinghai, China

<sup>4</sup>Division of Nephrology and Hypertension, Department of Medicine, Mayo Clinic, Rochester, MN, USA

<sup>5</sup>Division of Pulmonary and Critical Care Medicine, Department of Medicine, Mayo Clinic, Rochester,  
MN, USA

† **These authors contributed equally and share the first authorship**

**Corresponding Author:**

**Correspondence to:** Jianguo Li, MD; Zhongnan Hospital of Wuhan University; 169 East Lake Road, PO  
Box 430071, Wuhan, Hubei, China; Email: [drjlg5361@163.com](mailto:drjlg5361@163.com)

**And also correspondence to:** Bo Hu, MD; Zhongnan Hospital of Wuhan University; 169 East Lake Road,  
PO Box 430071, Wuhan, Hubei, China; Email: [hobbier1979@163.com](mailto:hobbier1979@163.com)

## Supplementary Material

Supplementary Tables and Figures cited in main text

- Table S1: Diagnostic criteria for alcohol use disorder
- Table S2: Thiamine administration in this study
- Table S3: Vasopressors use for septic patients with AUD during ICU stay
- Table S4: Variables change among patients during ICU stay
- Table S5: Daily trends in GCS score
- Figure S1: Diagnostic criteria for sepsis
- Figure S2: The dynamic changes for prespecified variables
- Figure S3: Association between the cumulative dose of thiamine administered during ICU stay and 28-day mortality among septic patients with AUD
- Figure S4: Association between the duration of thiamine use during ICU stay and 28-day mortality among septic patients with AUD
- STROBE Statement—Checklist of items that should be included in reports of cohort studies

**Table S1: Diagnostic criteria for alcohol use disorder**

|                      | <b>ICD-9</b> | <b>Description</b>                                       |
|----------------------|--------------|----------------------------------------------------------|
|                      | 2910         | Alcohol withdrawal delirium                              |
|                      | 2911         | Alcohol-induced persisting amnestic disorder             |
|                      | 2912         | Alcohol-induced persisting dementia                      |
|                      | 2913         | Alcohol-induced psychotic disorder with hallucinations   |
|                      | 2915         | Alcohol-induced psychotic disorder with delusions        |
|                      | 29181        | Alcohol withdrawal                                       |
|                      | 29182        | Alcohol induced sleep disorders                          |
|                      | 29189        | Other alcohol-induced mental disorders                   |
|                      | 2919         | Unspecified alcohol-induced mental disorders             |
|                      | 30300        | Acute alcoholic intoxication in alcoholism, unspecified  |
| <b>AUD diagnosis</b> | 30301        | Acute alcoholic intoxication in alcoholism, continuous   |
|                      | 30302        | Acute alcoholic intoxication in alcoholism, episodic     |
|                      | 30303        | Acute alcoholic intoxication in alcoholism, in remission |
|                      | 30390        | Other and unspecified alcohol dependence, unspecified    |
|                      | 30391        | Other and unspecified alcohol dependence, continuous     |
|                      | 30392        | Other and unspecified alcohol dependence, episodic       |
|                      | 30393        | Other and unspecified alcohol dependence, in remission   |
|                      | 30500        | Alcohol abuse, unspecified                               |
|                      | 30501        | Alcohol abuse, continuous                                |
|                      | 30502        | Alcohol abuse, episodic                                  |
|                      | 30503        | Alcohol abuse, in remission                              |

AUD was confirmed according to the criteria of International Classification of Diseases, 9th edition [ICD-9].

Abbreviations: AUD, alcohol use disorder; ICD-9, International Classification of Diseases, 9th edition.

**Table S2: Thiamine administration in this study**

| <b>Variable</b>                                        | <b>Thiamine, n=233</b> |
|--------------------------------------------------------|------------------------|
| The first time of intravenous thiamine received in ICU |                        |
| Within 24 hours, %                                     | 175/233(75.1)          |
| Within 48 hours, %                                     | 201/233(86.3)          |
| Within 72 hours, %                                     | 215/233(92.3)          |
| Daily dose of thiamine use in ICU, mg                  | 100(100-100)           |
| <100 mg, %                                             | 24/233(10.3)           |
| =100 mg, %                                             | 179/233(76.8)          |
| 101-200 mg, %                                          | 18/233(7.7)            |
| > 200 mg, %                                            | 12/233(5.2)            |
| Cumulative dose of thiamine use in ICU, mg             | 200(100-345)           |
| <100 mg, %                                             | 10(4.3)                |
| =100 mg, %                                             | 83(35.6)               |
| 100-200 mg, %                                          | 44(18.9)               |
| 200-345 mg, %                                          | 38(16.3)               |
| ≥345 mg, %                                             | 58(24.9)               |
| Days of thiamine use in ICU, day                       | 1(1-3)                 |
| 1 day, %                                               | 125/233(53.6)          |
| 2 day, %                                               | 41/233(17.6)           |
| 3 day, %                                               | 33/233(14.2)           |
| 4 day, %                                               | 16/233 (6.9)           |
| ≥5 day, %                                              | 18/233(7.7)            |
| Cumulative duration of thiamine use in ICU, hours      | 18(7-63)               |

Abbreviations: ICU, intensive care unit.

**Table S3: Vasopressors use for septic patients with AUD during ICU stay**

| <b>Duration of vasopressors use during ICU stay, hours</b> | <b>All, n=944</b> | <b>Non-thiamine, n=711</b> | <b>Thiamine, n=233</b> | <b>P value</b> |
|------------------------------------------------------------|-------------------|----------------------------|------------------------|----------------|
| Norepinephrine                                             | 27(9-60) (n=323)  | 26(9-54) (n=247)           | 30(7-86) (n=76)        | 0.404          |
| Phenylephrine                                              | 16(6-39) (n=184)  | 15(6-38) (n=133)           | 20(4-40) (n=51)        | 0.909          |
| Vasopressin                                                | 27(14-62) (n=89)  | 23(11-51) (n=67)           | 33(21-96) (n=22)       | 0.165          |
| Dopamine                                                   | 6(2-30) (n=53)    | 6(2-30) (n=45)             | 11(2-73) (n=8)         | 0.728          |
| Epinephrine                                                | 11(2-30) (n=10)   | 12(3-53) (n=8)             | -(n=2)                 | 0.296          |
| Milrinone                                                  | 119(47-147) (n=6) | 110(43-151) (n=5)          | -(n=1)                 | 0.770          |
| Dobutamine                                                 | 1(0.3-18) (n=5)   | -(n=1)                     | 1.2(0.4-27) (n=4)      | 0.480          |

Abbreviations: AUD, alcohol use disorder; ICU, intensive care unit.

**Table S4: Changes in variables among patients during ICU stay**

| <b>Variables change</b>                       | <b>All,<br/>n=944</b> | <b>Non-thiamine,<br/>n=711</b> | <b>Thiamine, n=233</b> | <b>P value</b> |
|-----------------------------------------------|-----------------------|--------------------------------|------------------------|----------------|
| △Lactate, mmol/L                              | -1.2(-2.9 to -0.1)    | -1.3(-3.3 to 0)                | -0.9(-2.7 to -0.1)     | 0.987          |
| △Heart rate, bpm                              | -6(-19 to 5)          | -5(-18 to 5)                   | -7(-19 to 5)           | 0.621          |
| △Respiratory rate                             | 0(-4 to 4)            | 0(-4 to 4)                     | 1(-4 to 5)             | 0.232          |
| △Systolic blood pressure, mmHg                | 5(-5 to 18)           | 5(-5 to 18)                    | 7(-6 to 18)            | 0.912          |
| △Diastolic blood pressure, mmHg               | 0(-8 to 7)            | 0(-7 to 7)                     | 0(-10 to 7)            | 0.696          |
| △Serum creatine, mg/dL                        | -0.2(-0.6 to 0)       | -0.3(-0.6 to 0)                | -0.2(-0.5 to 0)        | 0.341          |
| △Blood urea nitrogen, mg/dL                   | -2(-12 to 6)          | -2(-12 to 7)                   | -2(-10 to 5)           | 0.992          |
| △White blood cell count, ×10 <sup>3</sup> /uL | -2.4(-6.9 to 1.0)     | -2.3(-0.4 to 0.8)              | -2.6(-7.2 to 1.2)      | 0.726          |
| △Serum magnesium, mg/dL                       | -0.1(-0.4 to 0.1)     | -0.1(-0.4 to 0.1)              | -0.1(-0.4 to 0.2)      | 0.287          |

△ represented the change between Day 7 and Day 1

**Table S5: Daily trends in GCS score.**

|                         | <b>Intervention group</b> | <b>Control group</b> |
|-------------------------|---------------------------|----------------------|
| Day 1 GCS, medium (IQR) | 14(13-15)                 | 15(13-15)            |
| Day 2 GCS, medium (IQR) | 15(13-15)                 | 15(14-15)            |
| Day 3 GCS, medium (IQR) | 15(13-15)                 | 15(14-15)            |
| Day 4 GCS, medium (IQR) | 15(13-15)                 | 15(14-15)            |
| Day 5 GCS, medium (IQR) | 15(12-15)                 | 15(14-15)            |
| Day 6 GCS, medium (IQR) | 14.5(13-15)               | 15(14-15)            |
| Day 7 GCS, medium (IQR) | 15(13.5-15)               | 15(14-15)            |

Abbreviations: GCS, Glasgow Coma Scale.

Figure S1: Diagnostic criteria for sepsis

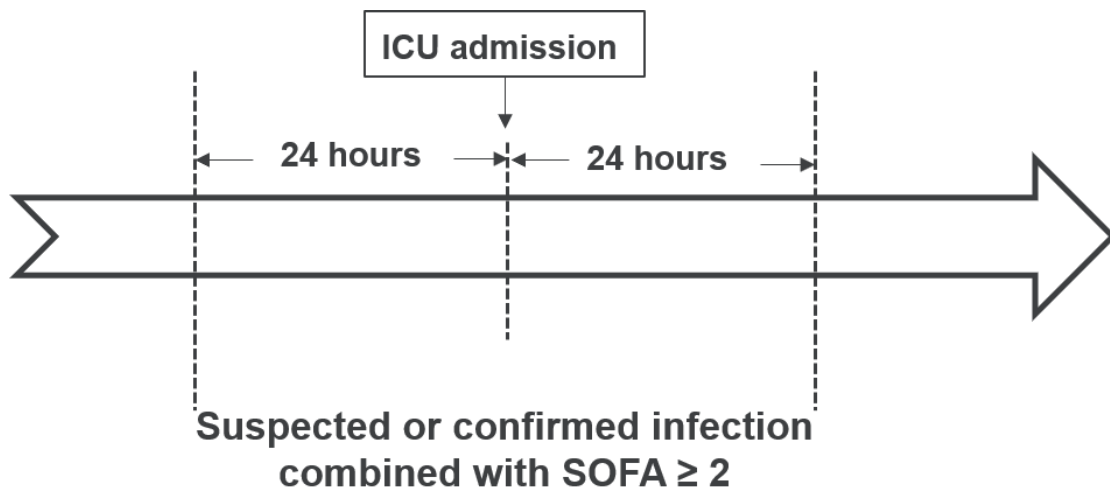

Patients with suspected or documented infection combined SOFA score no less than 2 points were diagnosed sepsis (Diagnosis time between 24 hours before ICU admission and 24 hours after ICU admission).

Abbreviations: SOFA, Sequential Organ Failure Assessment; ICU, intensive care unit.



**Figure S2: The dynamic changes up to day 7 for prespecified variables**

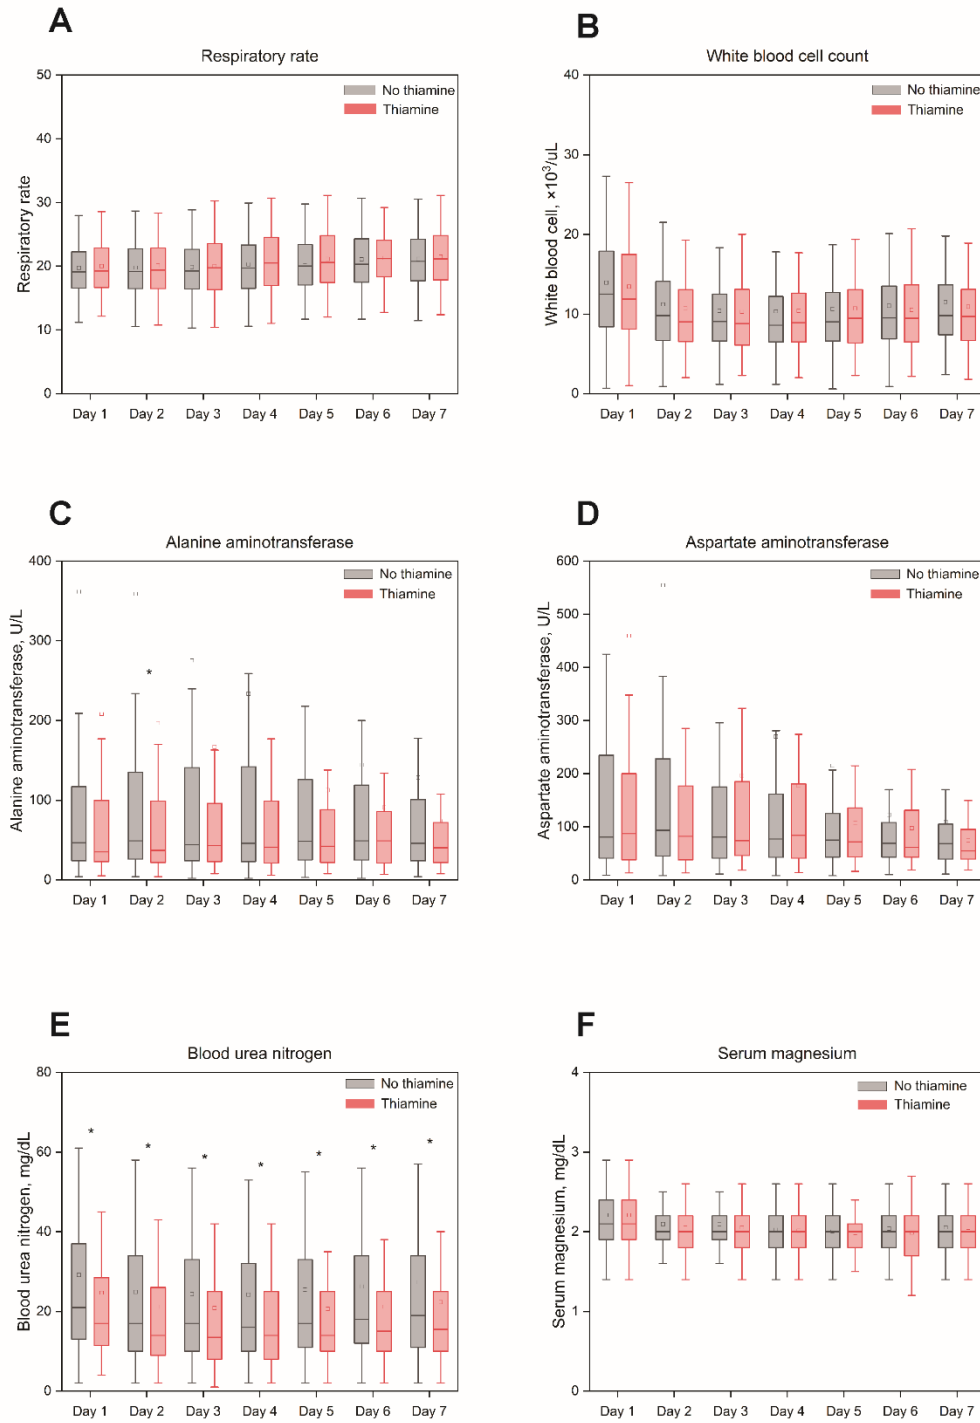

\* represented  $p < 0.05$

The square icon in each group represented mean value.

Figure S3: Association between the cumulative dose of thiamine administered during ICU stay and

28-day mortality among septic patients with AUD

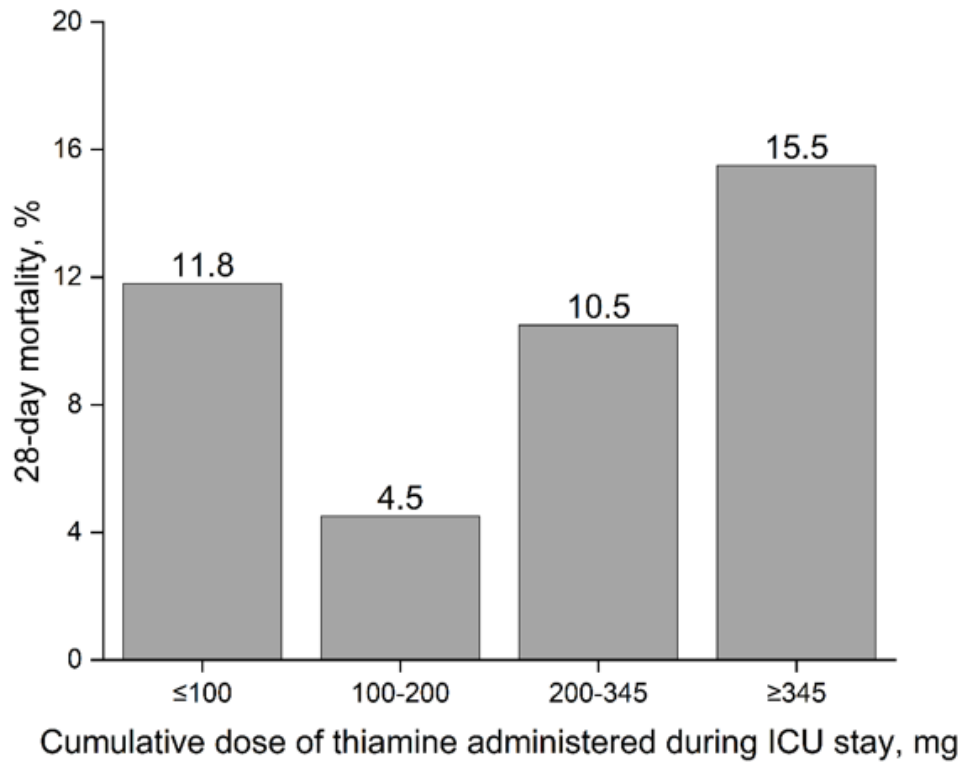

| Dose         | No. of patients | 28-day mortality     | P value |
|--------------|-----------------|----------------------|---------|
| ≤100 mg      | 93              | 11/93(11.8%)         | 0.375   |
| 100-200 mg   | 44              | 2/44(4.5%)           |         |
| 200-345 mg   | 38              | 4/38(10.5%)          |         |
| ≥345 mg      | 58              | 9/58(15.5%)          |         |
| <b>Total</b> | <b>233</b>      | <b>26/233(11.2%)</b> |         |

Abbreviations: AUD, alcohol use disorder; ICU, intensive care unit.

**Figure S4: Association between the duration of thiamine use during ICU stay and 28-day mortality among septic patients with AUD**

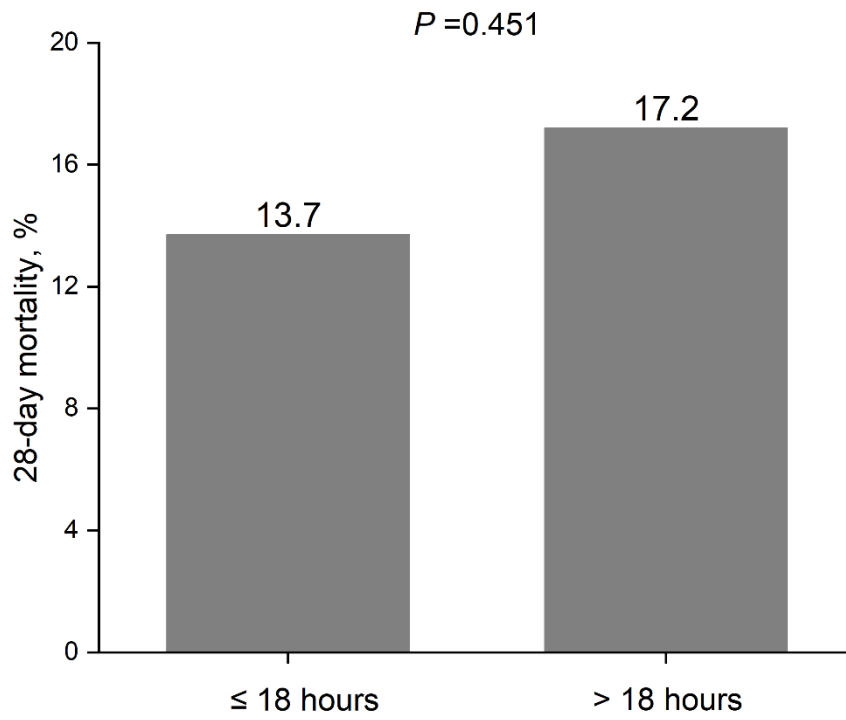

Abbreviations: AUD, alcohol use disorder; ICU, intensive care unit.

STROBE Statement—Checklist of items that should be included in reports of *cohort studies*

|                              | Item No | Recommendation                                                                                                                                                                                                                                                                                                         | Page No |
|------------------------------|---------|------------------------------------------------------------------------------------------------------------------------------------------------------------------------------------------------------------------------------------------------------------------------------------------------------------------------|---------|
| <b>Title and abstract</b>    | 1       | (a) Indicate the study's design with a commonly used term in the title or the abstract<br>(b) Provide in the abstract an informative and balanced summary of what was done and what was found                                                                                                                          | 1-3     |
| <b>Introduction</b>          |         |                                                                                                                                                                                                                                                                                                                        |         |
| Background/rationale         | 2       | Explain the scientific background and rationale for the investigation being reported                                                                                                                                                                                                                                   | 5       |
| Objectives                   | 3       | State specific objectives, including any prespecified hypotheses                                                                                                                                                                                                                                                       | 5       |
| <b>Methods</b>               |         |                                                                                                                                                                                                                                                                                                                        |         |
| Study design                 | 4       | Present key elements of study design early in the paper                                                                                                                                                                                                                                                                | 5-6     |
| Setting                      | 5       | Describe the setting, locations, and relevant dates, including periods of recruitment, exposure, follow-up, and data collection                                                                                                                                                                                        | 5-6     |
| Participants                 | 6       | (a) Give the eligibility criteria, and the sources and methods of selection of participants. Describe methods of follow-up<br>(b) For matched studies, give matching criteria and number of exposed and unexposed                                                                                                      | 6       |
| Variables                    | 7       | Clearly define all outcomes, exposures, predictors, potential confounders, and effect modifiers. Give diagnostic criteria, if applicable                                                                                                                                                                               | 6-7     |
| Data sources/<br>measurement | 8*      | For each variable of interest, give sources of data and details of methods of assessment (measurement). Describe comparability of assessment methods if there is more than one group                                                                                                                                   | 6-8     |
| Bias                         | 9       | Describe any efforts to address potential sources of bias                                                                                                                                                                                                                                                              | 7-8     |
| Study size                   | 10      | Explain how the study size was arrived at                                                                                                                                                                                                                                                                              | 8       |
| Quantitative variables       | 11      | Explain how quantitative variables were handled in the analyses. If applicable, describe which groupings were chosen and why                                                                                                                                                                                           | 8       |
| Statistical methods          | 12      | (a) Describe all statistical methods, including those used to control for confounding<br>(b) Describe any methods used to examine subgroups and interactions<br>(c) Explain how missing data were addressed<br>(d) If applicable, explain how loss to follow-up was addressed<br>(e) Describe any sensitivity analyses | 8-10    |
| <b>Results</b>               |         |                                                                                                                                                                                                                                                                                                                        |         |
| Participants                 | 13*     | (a) Report numbers of individuals at each stage of study—eg numbers potentially eligible, examined for eligibility, confirmed eligible, included in the study, completing follow-up, and analysed<br>(b) Give reasons for non-participation at each stage<br>(c) Consider use of a flow diagram                        | 10      |
| Descriptive data             | 14*     | (a) Give characteristics of study participants (eg demographic, clinical, social) and information on exposures and potential confounders<br>(b) Indicate number of participants with missing data for each variable of interest<br>(c) Summarise follow-up time (eg, average and total amount)                         | 10-11   |
| Outcome data                 | 15*     | Report numbers of outcome events or summary measures over time                                                                                                                                                                                                                                                         | 10-11   |

|                          |    |                                                                                                                                                                                                                                                                                                                                                                                                                       |       |
|--------------------------|----|-----------------------------------------------------------------------------------------------------------------------------------------------------------------------------------------------------------------------------------------------------------------------------------------------------------------------------------------------------------------------------------------------------------------------|-------|
| Main results             | 16 | (a) Give unadjusted estimates and, if applicable, confounder-adjusted estimates and their precision (eg, 95% confidence interval). Make clear which confounders were adjusted for and why they were included<br><br>(b) Report category boundaries when continuous variables were categorized<br><br>(c) If relevant, consider translating estimates of relative risk into absolute risk for a meaningful time period | 11    |
| Other analyses           | 17 | Report other analyses done—eg analyses of subgroups and interactions, and sensitivity analyses                                                                                                                                                                                                                                                                                                                        | 12-13 |
| <b>Discussion</b>        |    |                                                                                                                                                                                                                                                                                                                                                                                                                       |       |
| Key results              | 18 | Summarise key results with reference to study objectives                                                                                                                                                                                                                                                                                                                                                              | 14    |
| Limitations              | 19 | Discuss limitations of the study, taking into account sources of potential bias or imprecision. Discuss both direction and magnitude of any potential bias                                                                                                                                                                                                                                                            | 16-17 |
| Interpretation           | 20 | Give a cautious overall interpretation of results considering objectives, limitations, multiplicity of analyses, results from similar studies, and other relevant evidence                                                                                                                                                                                                                                            | 17    |
| Generalisability         | 21 | Discuss the generalisability (external validity) of the study results                                                                                                                                                                                                                                                                                                                                                 | 14-17 |
| <b>Other information</b> |    |                                                                                                                                                                                                                                                                                                                                                                                                                       |       |
| Funding                  | 22 | Give the source of funding and the role of the funders for the present study and, if applicable, for the original study on which the present article is based                                                                                                                                                                                                                                                         | 19    |

\*Give information separately for exposed and unexposed groups.

**Note:** As the checklist was provided upon initial submission, the page number reported may be changed due to copyediting and may not be referable in the published version.
